# Supplementary material
Source: Springer Nature journal article supplement (https://www.springermedizin.de/resource/supplementary/12889_2013_6570_MOESM3_ESM.pdf/9498272)
Supplement: MOESM3 [file 9498272]

## Exposure Factors

Climate factors

Socio-economic factors

## Variable Selection

Multicollinearity evaluation

Forward stepwise regression

Epidemiological theory

## Selected Variable

Average temperature

Average precipitation

Average wind speed

Population density

Number of enterprises

Proportion of student population

## Model Building

Logistic

Spatial covariate

AutoLogistic

## Model evaluation

Goodness of fit

Prediction accuracy rate

Equation parameters

## Results

Spatial risk factors:OR

Probability of disease occurrence

Risk mapping

## Exposure Factors

Climate factors

Socio-economic factors

## Variable Selection

Multicollinearity evaluation

Forward stepwise regression

Epidemiological theory

## Selected Variable

Average temperature

Average precipitation

Average wind speed

Population density

Number of enterprises

Proportion of student population

## Model Building

Logistic

Spatial covariate

AutoLogistic

## Model evaluation

Goodness of fit

Prediction accuracy rate

Equation parameters

## Results

Spatial risk factors:OR

Probability of disease occurrence

Risk mapping
